# Supplementary material
Source: MDPI journal article supplement (https://www.mdpi.com/2311-7524/7/9/302)
Supplement: s1 [file s1]

**Table S1.** Effect of the fixed factors soil, cultivar and inoculation, and their interactions on the different parameters, analyzed by factorial ANOVA ( $p \leq 0.05$ ). Asterisks (\*) denote significant effects.

|                               | Soil    | Cultivar | Inoculation | Soil ×<br>Cultivar | Soil ×<br>Inoculation | Cultivar ×<br>Inoculation | Soil ×<br>Cultivar ×<br>Inoculation |
|-------------------------------|---------|----------|-------------|--------------------|-----------------------|---------------------------|-------------------------------------|
| Chlorophyll a + b             | 0.212   | 0.837    | 0.938       | 0.98               | 0.529                 | 0.111                     | 0.952                               |
| Stomatal conductance          | 0.908   | 0.939    | 0.518       | 0.561              | 0.785                 | 0.454                     | 0.343                               |
| Specific nitrogenase activity | 0.282   | 0.71     | 0.845       | 0.677              | 0.741                 | 0.884                     | 0.907                               |
| Total nitrogenase activity    | <0.001* | 0.425    | 0.393       | 0.482              | 0.888                 | 0.489                     | 0.25                                |
| Cluster root number           | 0.415   | 0.721    | 0.237       | 0.659              | 0.752                 | 0.85                      | 0.348                               |
| Cluster root fresh weight     | 0.712   | 0.689    | 0.46        | 0.341              | 0.92                  | 0.638                     | 0.677                               |
| [Hg] nodules                  | <0.001* | 0.559    | 0.795       | 0.588              | 0.579                 | 0.812                     | 0.831                               |
| [Hg] roots                    | <0.001* | 0.137    | 0.908       | 0.6                | 0.79                  | 0.726                     | 0.825                               |
| [Hg] cluster roots            | <0.001* | 0.087    | 0.712       | 0.75               | 0.59                  | 0.663                     | 0.192                               |
| Bioaccumulation factors       | <0.001* | 0.303    | 0.72        | 0.307              | 0.622                 | 0.686                     | 0.303                               |

**Table S2.** Effect of the fixed factors Hg treatment and P concentration, and their interactions on the different parameters, analyzed by factorial ANOVA ( $p \leq 0.05$ ). Asterisks (\*) denote significant effects.

|                               | Hg      | [P]     | Hg x [P] |
|-------------------------------|---------|---------|----------|
| Cluster root number           | 0.816   | 0.248   | 0.973    |
| Cluster root fresh weight     | <0.001* | 0.44    | 0.392    |
| Aerial parts fresh weight     | <0.001* | 0.165   | 0.298    |
| Leaf area                     | 0.012*  | 0.115   | 0.39     |
| Nodules number                | <0.001* | 0.734   | 0.485    |
| Nodules fresh weight          | 0.312   | 0.017** | 0.805    |
| Specific nitrogenase activity | 0.577   | 0.069   | 0.922    |
| Total nitrogenase activity    | 0.002*  | 0.016** | 0.59     |
| [Hg] in underground tissues   |         | 0.122   |          |
| Bioaccumulation factors       |         | 0.123   |          |

\*\*The analysis of variance indicated significant effects, but post-hoc one-way ANOVA did not evince significant differences.
